# Supplementary material for: Film Excerpts Shown to Specifically Elicit Various Affects Lead to Overlapping Activation Foci in a Large Set of Symmetrical Brain Regions in Males
Source: PLoS One. 2011 Jul 27;6(7):e22343. doi: 10.1371/journal.pone.0022343 (PMC3144904; doi:10.1371/journal.pone.0022343)
Supplement: Table S1 — Voxel peak coordinates for the ‘amusement-neutral’ contrast. (XLSX) [file pone.0022343.s001.xlsx]

## Sheet: Sheet1
Table S1
Voxel peak coordinates for the 'amusement-neutral' contrast
Region Name	X, Y, Z Coordinates (MNI)	t value
Left Frontal Cortex
Medial prefrontal cortex	-2, 54, 14	6.15
Orbitofrontal cortex	-38, 36, -18	3.7
Dorsomedial prefrontal cortex	-4, 46, 36	5.86
Supplementary motor Area	-6, 12, 62	6.27
Supplementary motor Area	-45, 10, 30	10.42 nda*
Supplementary motor Area	-44, 0, 40	10.60 nda*
Inferior frontal gyrus	-52, 22, 20	5.94
Frontal operculum	-52, 22, -4	9.53
Right Frontal Cortex
Medial prefrontal cortex	6, 52, 18	5.78
Orbitofrontal cortex	44, 26., -10	4.84
Dorsomedial prefrontal cortex	4, 52, 30	4.25
Supplementary motor area	12, 2, 72	5.46 nda
Supplementary motor area	44, 0, 54	7.43 nda*
Inferior frontal gyrus	48, 24, 12	4.52
Frontal operculum	56, 24, 6	4.16
Left Temporal
Posterior inferior temporal cortex	-42, -44, -22	7.48
Posterior middle temporal cortex	-60, -44, 2	13.66 nda*
Posterior superior temporal cortex	-58, -48, 8	12.12 nda*
Middle temporal gyrus	-52, -28, -12	7.12 nda*
Middle temporal gyrus	-52, -12, -20	7.59 nda*
Temporal pole	-32, 10, -30	4.4
Right Temporal
Posterior inferior temporal cortex	44, -52, -20	7.61
Posterior middle temporal cortex	54, -48, 4	8.67 nda*
Posterior superior temporal cortex	56, -48, 6	9.51
Middle temporal gyrus	52, 0, -24	6.37 nda
Temporal pole	42, 14, -32	6.38
Left Parietal
Inferior parietal lobule	-62, -44, 26	8.61 nda*
Superior parietal lobule	-30, -48, 62	6.31 nda
Right Parietal
Inferior parietal lobule	56, -36, 20	7.92 nda*
Superior parietal lobule	34, -42, 6	4.81 nda
Left Occipital
Lateral occipital cortex	-54, -72, 4	11.11
Inferior occipital cortex	-38, -80, -16	7.02
Medial V1	-4, -86, 4	6.86
Right Occipital
Lateral occipital cortex	48, -74, 2	7.94
Inferior occipital cortex	38, -84, -14	12.07 nda*
Medial V1	4, -94, 8	8.7 nda*
Other Cortical Areas (Left)
Temporo-occipital junction	-52, -58, 8	7.09 nda
Dorsal anterior cingulate gyrus	-6, 18, 30	3.71
Precuneus	-6, -52, 42	9.51 nda*
Other Cortical Areas (Right)
Temporo-occipital junction	56, -60, 6	8.52
Precuneus	8, -56, 50	7.74 nda*
Left Subcortical
Thalamus	-4, -16, 4	6.27
Subthalamic nucleus	-12, -12, -4	4.82
Dorsal posterior hypothalamus	-2, -4, -4	4.65 nda
Amygdala	-20, -12, -22	5.37
Hippocampus	-22, -18, -16	6.31 nda
Globus pallidus	-22, -4, -6	3.67
Periaqueductal gray	-4, -32, -14	6.67
Lower Brainstem	-6, -38, -42	4.30 nda
Right Subcortical
Thalamus	8, -16, 6	6.37
Subthalamic nucleus	8, -14, -4	3.89
Dorsal posterior hypothalamus	4, -4, -6	3.66 nda
Amygdala	24, -2, -24	4.71
Hippocampus	28, -14, -18	7.34
Periaqueductal gray	8, -28, -14	6.41
Lower Brainstem	8, -36, -42	4.72 nda
Cerebellum
Left cerebellar hemisphere	-40, -62, -20	4.07
Left cerebellar hemisphere	-20, -86, -27	7.50 nda*
Right cerebellar hemisphere	42, -58, -26	8.25
Right cerebellar hemisphere	18, -80, -42	14.18 nda*
Vermis	0, -62, -26	9.01 nda*
nda : region not determined a priori
nda*: region not determined a priori but that survived a 0.05 FWE-corrected threshold
