# Supplementary material for: Film Excerpts Shown to Specifically Elicit Various Affects Lead to Overlapping Activation Foci in a Large Set of Symmetrical Brain Regions in Males
Source: PLoS One. 2011 Jul 27;6(7):e22343. doi: 10.1371/journal.pone.0022343 (PMC3144904; doi:10.1371/journal.pone.0022343)
Supplement: Table S5 — Regions more activated for the amusement than for the disgust and sexual arousal conditions. (XLSX) [file pone.0022343.s005.xlsx]

## Sheet: Sheet1
Table S5
Regions more activated for the amusement than for the disgust and sexual arousal conditions
Region Name	X, Y, Z Coordinates (MNI)	t value
Left Temporal
Posterior middle temporal cortex	-60, -46, 2	5.46
Middle temporal cortex	-52, -28, -12	5.01
Temporal pole	-54, 4, -24	6.02
Right Temporal
Posterior middle temporal cortex	68, -40, -2	4.2
Temporal pole	34, 8, -40	4.44
Parietal
Precuneus	0, -56, 54	3.73
Occipital
Occipital cortex	4, -92, 10	4.89
Other Cortical Areas (Left)
Temporo-parieto-occipital cortex	-52, -44, 8	5.87
Other Cortical Areas (Right)
Temporo-parieto-occipital cortex	'64, -56, 18	5.72
