# Supplementary material for: Film Excerpts Shown to Specifically Elicit Various Affects Lead to Overlapping Activation Foci in a Large Set of Symmetrical Brain Regions in Males
Source: PLoS One. 2011 Jul 27;6(7):e22343. doi: 10.1371/journal.pone.0022343 (PMC3144904; doi:10.1371/journal.pone.0022343)
Supplement: Table S6 — Regions more activated for the disgust condition than for the amusement and sexual arousal conditions. (XLSX) [file pone.0022343.s006.xlsx]

## Sheet: Sheet1
Table S6
Regions more activated for the disgust condition than for the amusement and sexual arousal conditions
Region Name	X, Y, Z Coordinates (MNI)	t value
Left Frontal Cortex
Frontal operculum/anterior insula junction	-36, 30, 4	3.3
Right Parietal Cortex
Postcentral gyrus	68, -24, 30	3.49
Left Temporal Cortex
Fusiform gyrus	-28, -60, -10	3.99
Right Temporal Cortex
Fusiform gyrus	32, -62, -8	3.46
Left Occipital Cortex
Lateral occipital cortex	-26, -88, 6	5.17
Lateral occipital cortex	-26, -94, 24'	3.88
Right Occipital Cortex
Lateral occipital cortex	32, -90, 12	4.55
Other Cortical Area
Right ventral mid insula	40, 8, -14	3..3
Subcortical Areas
Periaqueductal gray	0, -16, -18	3.44
Posterior pons	0, -30, -20	3.42
Left globus pallidus	-8, -6, -10	3.33
Left amygdala	-26, -6, -16	3.14
Let hypothalamus	-7, -6, -12	3.13
Cerebellum
Vermis	0, -70, -10	3.71
