# Supplementary material for: Film Excerpts Shown to Specifically Elicit Various Affects Lead to Overlapping Activation Foci in a Large Set of Symmetrical Brain Regions in Males
Source: PLoS One. 2011 Jul 27;6(7):e22343. doi: 10.1371/journal.pone.0022343 (PMC3144904; doi:10.1371/journal.pone.0022343)
Supplement: Table S7 — Regions significantly more activated for the sexual arousal condition than for the amusement and disgust conditions. (XLSX) [file pone.0022343.s007.xlsx]

## Sheet: Sheet1
Table 7
Regions significantly more activated for the sexual arousal
condition than for the amusement and disgust conditions
Region Name	X, Y, Z Coordinates (MNI)	t value
Left and Mid-Sagittal Frontal Cortex
Medial ventral prefrontal cortex	-4, 40, -16	4.14
Medial ventral prefrontal cortex	0, 38, -16	4.55
Right Frontal Cortex
Medial ventral prefrontal cortex	4, 38, -16	4.58
Left Temporal Cortex
Posterior inferior temporal cortex	-56, -62, -12	4.14
Right Temporal Cortex
Posterior inferior temporal cortex	42, -74, -10	3.55
Left Parietal Cortex
Superior parietal lobule	-22, -54, 68	4.39
Superior parietal lobule	-26, -74, 52	5.29
Right Parietal Cortex
Superior parietal lobule	28, -50, 70	4.35
Superior parietal lobule	36, -54, 56	5.17
Other Cortical Areas (Left)
Anterior cingulate cortex	-4, 36, -14	3.83
Posterior cingulate gyrus	-4, -38, 32	4.59
Precuneus	-8, -78, 44	4.25
Precuneus	-2, -76, 48	3.61
Other Cortical Areas (Right)
Right anterior cingulate	4, 36, -12	3.75
Posterior cingulate gyrus	2, -38, 32	5.41
Precuneus	6, -78, 50	4.62
Precuneus	8, -70, 38	4.13
Cerebellum
Left cerebellar hemisphere	-28, -60, -30	3.35
